# Supplementary material
Source: PubMed Central journal article supplement (PMC9994383)
Supplement: NIHMS1875106-supplement-1.pdf [file NIHMS1875106-supplement-1.pdf]

974  
975  
976  
977  
978  
979  
980  
981  
982  
983  
984  
985  
986  
987  
988  
989  
990  
991  
992  
993  
994  
995  
996  
997  
998  
999  
1000  
1001  
1002  
1003

## Supplementary Materials for

# **Reducing Ischemia Kidney Injury Through the Application of a Synchronization Modulation Electric Field to Maintain Na<sup>+</sup>/K<sup>+</sup>-ATPase Functions**

**The PDF file includes:**  
**Materials and Methods**  
**Figs. S1 to S3**  
**References (57–67)**

### **Materials and Methods**

#### **Composition of the solutions**

Relaxing solution: 120mM Potassium Glutamate, 5mM K<sub>2</sub>PIPES, 1mM MgSO<sub>4</sub>, 0.1mM K<sub>2</sub>EGTA.

External solution: 3.5mM 3,4-Diaminopyridine (3,4-DAP), 86mM NaCl, 10mM CsCl, 4mM KCl, 2.15mM Na<sub>2</sub>HPO<sub>4</sub>, 0.85mM NaH<sub>2</sub>PO<sub>4</sub>·H<sub>2</sub>O, 1.8mM CaCl<sub>2</sub>, 1.5mM BaCl<sub>2</sub>·2H<sub>2</sub>O, 1μM Tetrodotoxin (TTX). The pH of the solution was adjusted to 7.10 via HCl at room temperature. Final [K]<sub>o</sub> was ~4mM and [Na]<sub>o</sub>~90mM.

Internal solution (at physiological condition): 58mM K-glutamate, 6.8mM MgSO<sub>4</sub> · 7H<sub>2</sub>O, 5mM MOPS, 20mM EGTA, 10mM CsOH, 4mM Na<sub>2</sub>-Creatine phosphate, 5mM 5'-ATP-K<sub>2</sub>. The pH of the solution was adjusted to 7.30 via KOH at room temperature.

Washing-out solution (Internal solution lack of ATP molecules): 68mM K-glutamate, 6.8mM MgSO<sub>4</sub>, 5mM MOPS, 20mM EGTA, 4mM K<sub>2</sub>HPO<sub>4</sub>, 10mM CsOH, 200nM Antimycin A. The pH of the solution was adjusted to 7.30 via KOH at room temperature.

MOPS: 3-(N-Morpholino) propanesulfonic acid; EGTA: Ethylene glycol-bis (2-aminoethylether)- N,N,N',N'-tetraacetic acid.

#### **Urinary flow and Na<sup>+</sup> excretion under the physiological conditions**

Sprague-Dawley rats were anesthetized with 70 mg/kg inactin (i.p.) and 50 mg/kg ketamine (i.m.) and then placed on a temperature-controlled table with the body temperature maintained at 37 °C throughout the experiment. The surgical procedure was similar as described previously (65, 66). Both the left and right ureters were catheterized

1004 with PE-50 tubing to collect urine from each kidney separately. For the urinary flow and  
1005 Na<sup>+</sup> excretion in response to 3<sup>rd</sup>gen-SMEF under physiological conditions, the  
1006 decelerating 3<sup>rd</sup>gen-SMEF was applied to one kidney using the electrode arrays and the  
1007 other kidney as control. After a 30-min equilibration period, the urine was collected in  
1008 Eppendorf tubes for 30 minutes as baseline. Then, the decelerating 3<sup>rd</sup>gen-SMEF was  
1009 turned on and urine was collected for another 30 minutes. The decelerating 3<sup>rd</sup>gen-SMEF  
1010 was then switched off and the urine was collected for another 30 minutes from both  
1011 kidneys. Sodium concentrations were measured with a Flame Photometer (BWB  
1012 Technologies).

### 1013 **Urinary flow in response to acute volume challenge**

1014 Acute volume expansion was performed as we previously reported (57, 58). Briefly,  
1015 SD rats were anesthetized with inactin (70 mg/kg, i.p.) and ketamine (50 mg/kg, i.m.). The  
1016 carotid artery was cannulated to monitor the mean arterial pressure (MAP). Saline  
1017 (0.9%NaCl) with 2% bovine serum albumin (BSA) was intravenously infused at a rate of  
1018 6 ml/hour through the jugular vein. The accelerating-3<sup>rd</sup>gen-SMEF was applied to both  
1019 kidneys throughout the experiment with the frequency increased from 50 Hz to 300Hz.  
1020 The potential difference applied between each pair of electrodes was 100 mV.

1021 After 30-min equilibrium, the urine samples (collected from both ureter catheters) were  
1022 collected continuously for 30 minutes before acute volume expansion as the baseline.  
1023 Then the rats were given an acute volume challenge by an intravenous bolus of 0.9%  
1024 normal saline (0.9%NaCl, 5% body weight, i.v.) using an infusion pump. For the treatment  
1025 group, the accelerating-3<sup>rd</sup>gen-SMEF was simultaneously turned on. The group of rats  
1026 without the application of electric field served as controls. Urine samples were collected  
1027 at 30 min intervals for 90 minutes after acute volume expansion for both control and  
1028 treatment groups. Then the accelerating-3<sup>rd</sup>gen-SMEF was turned off and the urine  
1029 samples were collected for additional 60 minutes. At the end of the experiment, both  
1030 kidneys were removed, drained, and weighed.

### 1031 **Plasma creatinine (Pcr) and Neutrophil gelatinase-associated lipocalin (NGAL)** 1032 **measurement**

1033 For Pcr concentration measurements, blood (20µl) was collected into a heparinized  
1034 micro capillary tube from the tail vein and was immediately centrifuged to separate blood

1035 cells from plasma. Plasma (10µl) was collected into an Eppendorf tube and stored in a -  
1036 80°C freezer until analyzed. Pcr concentrations were measured with HPLC-mass  
1037 spectrometry at O'Brien Center at the University of Alabama at Birmingham.

1038 Plasma NGAL levels were measured with an ELISA kit (R&D Systems, MLCN20)  
1039 following the manufacturer's instructions.

#### 1040 **Glomerular filtration rate (GFR) measurement in conscious mice**

1041 GFR was measured in conscious C57BL/6J mice using a single bolus intravenous  
1042 injection of fluorescein isothiocyanate-sinistrin (FITC-sinistrin) (Fresenius Kabi Austria  
1043 GmbH) as described recently with a modification (62, 63). Briefly, the FITC-sinistrin  
1044 solution (4 µl/g body weight) was injected via retro orbital sinus of the mice under light  
1045 anesthesia with isoflurane. Blood was collected (about 5 µl/each) from a small nick at the  
1046 end of the tail into a heparinized microcapillary tube at 3, 7, 10, 15, 35, 55, 75 and 90 min  
1047 after injection. The blood samples were centrifuged, and plasma fractions (2 µl/each)  
1048 were collected. FITC-sinistrin fluorescent intensities of the plasma samples were  
1049 measured using a plate reader (Cytation5, BioTek) with 485-nm excitation and 538-nm  
1050 emission. GFR was calculated using a two-compartment model of two-phase exponential  
1051 decay (GraphPad Prism) and was presented as microliters per minute (µl.min<sup>-1</sup>).

#### 1052 **Histology, Immunofluorescence and TUNEL staining on kidney tissue sections**

1053 Paraffin embedded kidney samples were sectioned into 4-µm slices. Histological  
1054 morphology and the degree of renal tubular injury were evaluated with periodic acid-Schiff  
1055 (PAS) staining and interstitial fibrosis was assessed with Masson Trichrome staining as  
1056 previously described (62, 63). For statistical analysis, at least 10 visual fields of each  
1057 specimen were randomly selected and photographed under the microscope (200×,  
1058 Olympus BX53), and the positive areas were statistically analyzed with Fiji/ImageJ.

1059 Tubular apoptosis was assessed by Terminal dUTP Nick-End Labeling (TUNEL)  
1060 staining with *in Situ* Cell Death Detection Kit (Roche, catalog no. 11684795910) according  
1061 to manufacturer's instructions. TUNEL-positive cells/nuclei are quantified as the  
1062 percentage (%) of TUNEL and DAPI double-positive cells relative to total cells (DAPI-  
1063 positive cells). For statistical analysis, 10 visual fields of each specimen were randomly  
1064 selected and photographed with fluorescence microscope (Keyence BZ-X710) and  
1065 analyzed with Fiji/ImageJ.

1066 For the immunofluorescence, the kidney slices were subjected to antigen retrieval with  
1067 a sodium citrate buffer and permeabilized with 0.3% Triton-X 100 in PBS, blocked with 5%  
1068 normal goat serum, and probed with the primary antibody CD31 (Abcam, ab182981).  
1069 After washing, the tissue sections were probed with a fluorophore-conjugated secondary  
1070 antibody Donkey Anti-Rabbit IgG H&L (Abcam, ab150075). Then, the tissue sections  
1071 were photographed with fluorescence microscope (Keyence BZ-X710) and analyzed with  
1072 Fiji/ImageJ. Five images per kidney were acquired and the CD31 density (vessel density)  
1073 index was calculated by dividing the CD31-positively stained area by the kidney area.

1074 All morphometric analyses were performed by an experienced renal pathologist (L.  
1075 Fu) blinded to the experimental procedures.

### 1076 **Western blotting**

1077 Western blotting was used to confirm the purity of isolated mitochondria protein.  
1078 Mitochondria protein extracts from kidney tissue (30 µg per lane) were separated on a  
1079 7.5 % SDS-PAGE gel as described previously (66, 67). After blocking for 1 hour at room  
1080 temperature with Odyssey Blocking buffer-TBS, the membranes were incubated  
1081 overnight with GAPDH and ATP5A antibodies (ab8245 and ab14748, Abcam,

1082 respectively) at 4°C. The membranes were then incubated with Goat anti-Mouse IgG H&L  
 1083 (IRDye® 800CW) secondary antibody (ab216772, Abcam) and imaged on an Odyssey  
 1084 Imager (Li-Cor).  
 1085

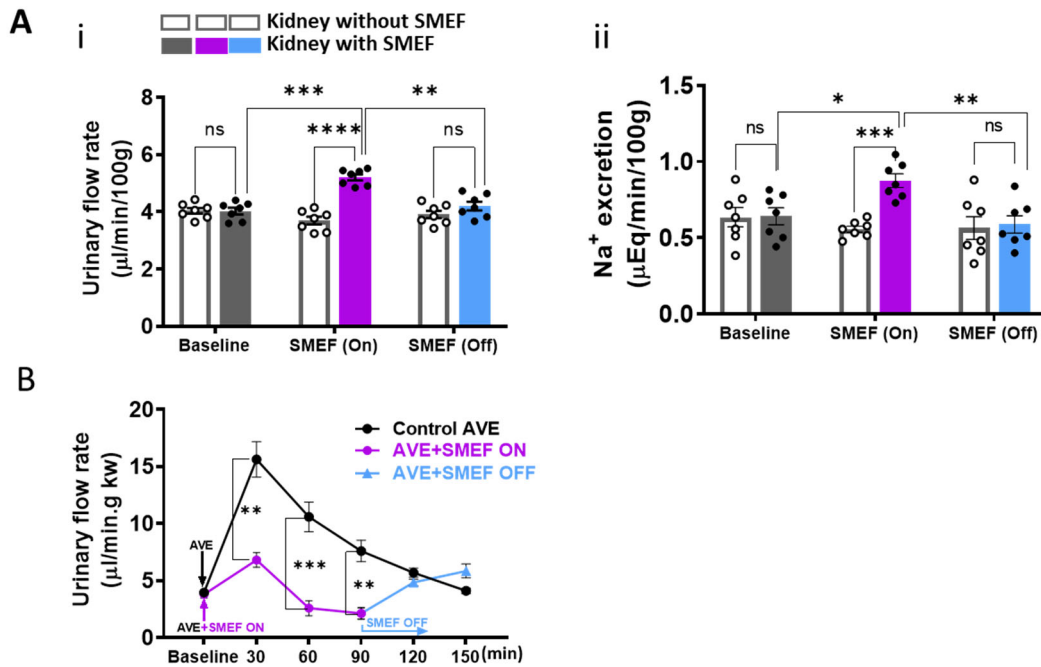

1086

1087 **Figure S1. Renal tubular sodium handling is modulated by the application of**  
 1088 **decelerating- and accelerating-3<sup>rd</sup>gen-SMEF *in vivo*.** The effects of 3<sup>rd</sup>gen-SMEF  
 1089 modulation of Na/K Pump activity on sodium handling under basal conditions and during  
 1090 a volume challenge were evaluated *in vivo*. **A** shows the urinary flow and sodium  
 1091 excretion rates before, during, and after application of *decelerating-3<sup>rd</sup>gen-SMEF*, which  
 1092 was only applied to the left kidney (the right served as a control). **A.i** represents urinary  
 1093 flow rates, while **A.ii** represents urinary sodium excretion rates. Prior to applying  
 1094 *decelerating-3<sup>rd</sup>gen-SMEF*, urine flow and sodium excretion rates were essentially the  
 1095 same in each kidney. Application of the *decelerating-3<sup>rd</sup>gen-SMEF* was associated with  
 1096 an increase in both parameters only in the treated kidney. When the *deaccelerating-*  
 1097 *3<sup>rd</sup>gen-SMEF* was turned off, all the measured factors returned to basal levels. Data are  
 1098 shown as mean ± s.e.m. Repeated measures ANOVA was performed (Asterisks  
 1099 represent an analysis with Bonferroni's multiple comparison test. n=7 rats, \*p<0.1;  
 1100 \*\*P < 0.01; \*\*\*P < 0.001; \*\*\*\*P<0.0001;). **B** illustrates renal responses to acute volume  
 1101 expansion in the presence and absence of *accelerating-3<sup>rd</sup>gen-SMEF* (note that 3<sup>rd</sup>gen-  
 1102 SMEF was applied to both kidneys in these experiments). Basal urinary flow rates were  
 1103 similar in both groups. Acute volume expansion caused a rapid and profound increase in  
 1104 urine flow that peaked within 30 minutes. The flow gradually decreased over the next 120  
 1105 minutes as the volume load from the saline bolus was excreted. The animals in which

1106 *accelerating-3<sup>rd</sup>gen-SMEF* was applied did not see this increase. Urine flow rates had  
1107 dipped returned to baseline after 30 minutes. Upon turning off the *accelerating-3<sup>rd</sup>gen-*  
1108 *SMEF*, the urine flow rate rapidly rose to above basal values and remained elevated for  
1109 the duration of the experiments. Data are shown as mean  $\pm$  s.e.m. The urinary flow rates  
1110 measured when the *accelerating-3<sup>rd</sup>gen-SMEF* was on were compared to the control  
1111 group by paired t-test (\*\*P < 0.01; \*\*\*P < 0.001; \*\*\*\*P<0.0001; n=5/group)  
1112

1113

1114

1115

1116

1117

1118

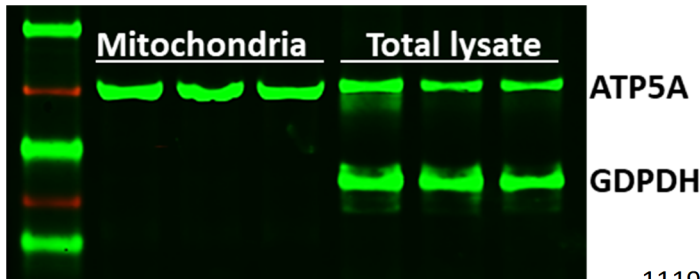

1119

1120 **Fig. S2. Isolated mitochondria.** A representative western blot of isolated mitochondria  
1121 and total tissue lysate. Mitochondrial membrane ATP synthase 5 antibody was used as a  
1122 marker for mitochondria. For the detection of potential contaminations, antibody against  
1123 GAPDH was also used.

1124

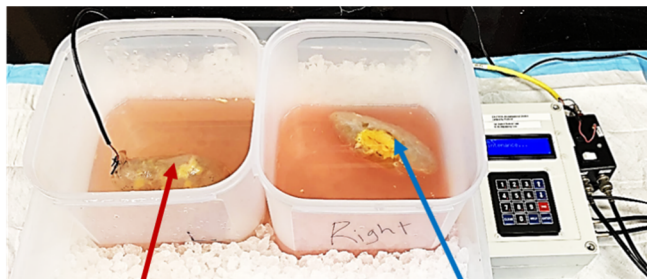

1125 **3<sup>rd</sup>gen-SMEF treated donor**

1126 **Untreated donor**

1127 **Figure. S3 Representative image for the application of the *accelerating-3<sup>rd</sup>gen-***  
1128 ***SMEF* on discarded human donor kidneys.** The paired control and treated kidneys  
1129 were from the same kidney donor. As showed in the image, the left kidney was applied  
1130 with *accelerating-3<sup>rd</sup>gen-SMEF* and the right kidney from the same donor was as  
1131 untreated control (n=5 pairs of kidney grafts from 5 kidney donors). The total storage time  
was 24 hours.

1132 **Data file S1.** Raw data for all figures where n is less than or equal to 20, including data  
1133 for Fig. 1D, Fig. 2Cii-iii and Diii, Fig. 3A, B and C i-iv, Fig. 4A, B, C, D and F, Fig. 5A, B,  
1134 C and E, Fig. 6B and fig. S1 A and B.

1135
